# Supplementary material
Source: PubMed Central journal article supplement (PMC7025381)
Supplement: ml9b00493_si_001.pdf [file ml9b00493_si_001.pdf]

## EXPERIMENTAL SECTION

### Discovery of Isoxazole Amides as Potent and Selective SMYD3 Inhibitors

Dai-Shi Su,<sup>\*,†</sup> Junya Qu,<sup>†</sup> Mark Schulz,<sup>†</sup> Chuck W. Blackledge,<sup>†</sup> Hongyi Yu,<sup>†</sup> Jenny Zeng,<sup>†</sup> Joelle Burgess,<sup>†</sup> Alexander Reif,<sup>†</sup> Melissa Stern,<sup>‡</sup> Raman Nagarajan,<sup>‡</sup> Melissa Baker Pappalardi,<sup>‡</sup> Kristen Wong,<sup>‡</sup> Alan P. Graves,<sup>§</sup> William Bonnette,<sup>||,≠</sup> Liping Wang,<sup>||</sup> Patricia Elkins,<sup>||</sup> Beth Knapp-Reed,<sup>†</sup> Jeffrey D. Carson,<sup>||</sup> Charles McHugh,<sup>‡</sup> Helai Mohammad,<sup>‡</sup> Ryan Kruger,<sup>‡</sup> Juan Luengo,<sup>†,≠</sup> Dirk A. Heerding,<sup>†,≠</sup> Caretha L. Creasy<sup>‡</sup>

<sup>†</sup>Medicinal Chemistry, Medicine Design, <sup>‡</sup>Oncology R&D, <sup>§</sup>Data and Computational Sciences, <sup>||</sup>Protein Cellular and Structural Sciences, Medicine Design, Medicinal Science and Technology GlaxoSmithKline, 1250 South Collegeville Road, Collegeville, PA, 19426, USA

All studies were conducted in accordance with the GSK Policy on the Care, Welfare and Treatment of Laboratory Animals and were reviewed by the Institutional Animal Care and Use Committee either at GSK or by the ethical review process at the institution where the work was performed.

#### General synthetic experimental procedures

Proton Nuclear Magnetic Resonance (<sup>1</sup>H NMR) spectra were recorded on a Bruker UltraShield™ 400 spectrometer operating at 400.132 MHz using a 5mm QNP probe unless otherwise specified. The 2D NMR spectra were recorded on a Bruker Avance 600 spectrometer operating at 600.13 MHz using a 5mm TXI cryoprobe. Spectra were taken in the indicated solvent at ambient temperature, and the chemical shifts are reported in parts per million (ppm (δ)) relative to the lock of the solvent used. Resonance patterns are recorded with the following notations: br (broad), s (singlet), d (doublet), t (triplet), q (quartet), and m (multiplet). Second order spectra in which coupling cannot be obtained by inspection are reported as multiplets, with the center of the signal indicated by the δ value given.

Starting reagents were purchased from commercial suppliers and were used without further purification unless otherwise specified. Microwave reactions were performed in a Biotage™ Initiator Sixty reactor using the manufacturer supplied vials, stir bars, and caps. Microwave reaction times are for time held at the specified temperature.

Normal phase column chromatography was carried out in the indicated solvent system (in the percentage of volume) using pre-packed silica gel cartridges (Reveleris®, Analogix® or Isco Redisep Gold) on the Analogix Intelliflash280®, Varian Intelliflash 971-FP, or Combiflash Companion purification systems. Analytical thin layer chromatography (TLC) visualization was

---

<sup>≠</sup> Current address: RN: University of California Davis; WGB: Janssen Pharmaceuticals, Spring House, PA 19477; JL: Prelude Therapeutics; DAH: retired

performed using 254 nm wavelength ultraviolet light. Preparative HPLC purifications (reversed-phase) were performed using a Gilson 215 Liquid Handler with Trilution software, typically with a SunFire(TM) Prep C18 OBD(TM) 5  $\mu$ M, 30 mm x 50 mm column. A 7 min gradient followed by a 3 min 100% organic hold time (47 mL/min, 30% gradient of ACN/H<sub>2</sub>O, 0.1% TFA) with UV detection at 254 nm was typically used.

All novel compounds were characterized by LCMS, and gave satisfactory results in agreement with the proposed structure. LCMS M+H signals were consistent with expected molecular weight for all reported products. LCMS data were acquired from a Waters Acquity Ultra Performance LC system with UV detector (Waters Acquity PDA) set to 210-350 nm. Samples were injected (0.2  $\mu$ L) onto a Thermo Hypersil Gold column (C18, 20x2.1 mm, 1.9  $\mu$  particle diam.) maintained at 55 °C. A linear gradient (1.9 min) from 2% to 95% B (MeCN/H<sub>2</sub>O, 0.02% TFA) with a flow rate of 1.6 mL/min was used. The mass spectra (MS) data were acquired in positive ion mode using a Water Acquity SQD (single quadrupole) mass spectrometer with a positive electrospray ionization source.

### Biochemical Studies

Recombinant proteins were prepared as described previously.<sup>14</sup> Scintillation proximity assay (SPA) technology was utilized to detect SMYD3 activity. Formation of the <sup>3</sup>H-MEKK2 product was followed via incorporation of the methyl group from <sup>3</sup>H-SAM to MEKK2 which is captured by a SPA bead (PerkinElmer). Increased proximity of the tritium labeled methyl group from <sup>3</sup>H-MEKK2 to the SPA bead produces a luminescent signal.

For IC<sub>50</sub> profiling, final assay concentrations were 1.5 nM SMYD3, 60 nM <sup>3</sup>H-SAM and 25 nM MEKK2 in 25 mM Tris pH 8.0, 4 mM DTT, 50  $\mu$ M ZnCl<sub>2</sub>, 0.0025% BSA, and 0.02% Pluronic Acid F127. After 40 minutes, an equal volume of quench (3 mM cold SAM and 1 mg/mL His tag capture SPA beads) was added to stop SMYD3 turnover. Plates were read on a Viewlux Imager (PerkinElmer).

For mode of inhibition studies (MOI), final assay concentrations were 1 nM SMYD3 in 25 mM Tris pH 8.0, 4 mM DTT, and 0.02% Pluronic Acid F127. Substrate concentrations of SAM and MEKK2 varied depending on the assay in addition to compound of interest. When the SAM concentration was varied (0.63-80 nM), MEKK2 was held at  $K_{m\text{ app}}$  (8.7 nM). Conversely, when MEKK2 was varied (0.78-100 nM), SAM was held at  $K_{m\text{ app}}$  (7.3 nM). After 60 minutes, an equal volume of quench (2 mM SAH) was added followed by the addition of 3x RNA binding SPA beads (4.5 mg/mL). Plates were read on a MicroBeta (PerkinElmer). For testing the inhibition of SMYD3 using a H4 substrate, final concentrations were adjusted to 100 nM SMYD3, 85 nM SAM and 1  $\mu$ M recombinant histone H4. IC<sub>50</sub> values were determined by fitting data to equation (1, fixed background) which assumes that  $V_i/V_o$  decreases with increasing

[1]. If assessment of inhibitor modality was based on the Cheng-Prusoff relation, data was fit to equation (2) for uncompetitive inhibition. Global fitting of the initial velocity data used equation (3) to determine the inhibition constant,  $K_i$ , and alpha values ( $\alpha = K_i'/K_i$ ) while resulting double-reciprocal plots were utilized to determine mode of inhibition. All data was analyzed using GraFit software.

$$(1) V_i/V_0 = Background + \frac{Range - Background}{1 + \left(\frac{[I]}{IC_{50}}\right)^s}$$

$$(2) K_i^{app} = \frac{IC_{50}}{1 + (K_m^{app}/[S])}$$

$$(3) v = \frac{V_{max} * [S]}{K_m \left(1 + \frac{[I]}{K_i}\right) + [S] \left(1 + \frac{[I]}{K_i'}\right)}$$

### Cell culture

HEK293 cells (American Type Culture Collection, CRL-1573) were cultured in RPMI (Life Technologies, A10491) supplemented with 10% fetal bovine serum (Sigma-Aldrich, 12176C).

### MEKK2me cellular mechanistic assay

HEK293 cells were transfected in bulk by seeding  $3 \times 10^6$  cells per T75 flask and incubated for 24 hr at 37 °C under 5% CO<sub>2</sub>. Transfection reactions were prepared by combining 6 µg of HA-tagged MEKK2 plasmid DNA (pLEX/HA-MEKK2, GRITS:132173) and 0.3 µg SMYD3 plasmid DNA (pLenti-SMYD3) or empty plasmid (pcDNA3.1+, Invitrogen #V90-20) in 1.5 ml Opti-MEM reduced serum media (Thermo Fisher Scientific, 51985091). Sixty µL of Lipofectamine 2000 (Thermo Fisher Scientific, 11668019) was diluted in 1.5 ml Opti-MEM reduced serum media and combined at a 1:1 ratio with the diluted plasmid DNA. Lipo-DNA complexes were allowed to form for 10 minutes at room temperature before transferring dropwise to the HEK293 flasks. Cells were incubated for 4-6 hr to allow absorption of the lipo-DNA complexes. Cell plates were prepared by plating transfected cells at 5,000 cells/48 µl per well in 384-well clear bottom plates (Greiner Bio-One, 781956) with MEKK2+SMYD3 transfected cells in 22 columns and MEKK2+empty vector in 2 columns. Compound plates were prepared by diluting compounds in DMSO over a 20-pt, 2-fold dilution scheme using the Hamilton Starlet liquid handing automation. An intermediate dilution was generated by stamping 4 µl of the compound plate into 105 µl of RPMI+10%FBS followed by stamping 2 µl of the intermediate dilution plate into the prepared cell plates (final DMSO concentration of 0.15%). Cells were

incubated at room temperature for 30 minutes to allow even distribution and settling prior to incubation for 24 hr at 37°C, 5% CO<sub>2</sub> and 95% relative humidity.

After 24 hr compound incubation, all media was aspirated, and cells were fixed and permeabilized by adding 50 µl of ice-cold 100% methanol and incubating at room temperature for 10 minutes. Plates were then washed 3 times with PBS using a Biotek ELX405 plate washer. Assay plates were blocked using 50 µl of Odyssey blocking buffer (Li-Cor, 927-40000) and incubated at room temperature for 1 hr with gentle rocking. Primary antibodies were prepared together in Odyssey blocking buffer + 0.1% tween with mouse anti-HA (Covance: MSS-10 IR HA.11, 16B12) at 1:20,000, and rabbit anti-MEKK2-K260me (Custom Yenzym; YZ5047 1<sup>st</sup> cycle, 0.14mg/ml) at 1:4,000. The anti-MEKK2-K260me antibody recognizes mono, di and trimethylated MEKK2-K260. Twenty-five µl of antibody mixture was added per well and plates were sealed tightly and placed at 4°C overnight with gentle rocking. Following overnight incubation, assay plates were washed 5 times with PBS+0.1% tween. Secondary antibodies were prepared together (Goat anti-mouse 680LT; LI-COR, 926-68020 and goat anti-rabbit 800CW; LI-COR, 926-32211) at 1:800 in Odyssey blocking buffer + 0.1% tween. Plates were incubated for 1 hr at room temperature with gentle shaking followed by 5 washes with PBS+0.1% tween, a final PBS rinse, and complete drying.

Plates were imaged using the Odyssey Imager (LI-COR) such that both the 680 and 800 channels are within the dynamic range of the instrument. To quantify image intensity a 384-well grid was overlaid onto each plate and the raw values exported. Wells co-transfected with SMYD3+MEKK2 and dosed with DMSO served as the positive controls. Any compound treated-well with less than 70% of the positive control HA signal was omitted from analysis due to cell loss. The ratio of MEKK2-K260me to MEKK2-HA was plotted versus compound concentration and fit to a standard 4-parameter logistic model to calculate EC<sub>50</sub> and IC<sub>50</sub>. All data represent a minimum of 2 separate biological replicas with an EC<sub>50</sub> range of less than 3-fold.

### **ERK1/2 phosphorylation**

A549 cells were seeded in 6-well plates in RPMI-1640 with 10% fetal bovine serum. After 48 hours, cells were washed with 1X D-PBS and low serum media (0.5% fetal bovine serum) was added. Duplicate wells were treated with 30 µM SMYD3 inhibitors, 250 nM Trametinib/GSK1120212 (ThermoFisher #NC0370092), or DMSO for 24 hrs. Immediately prior to cell harvest, one well of each duplicate treatment was stimulated with 25 ng/µl Epidermal Growth Factor (ThermoFisher #PHG0311L) for 15 min. Cells were washed in cold 1X D-PBS and scraped in cold 1X RIPA buffer containing protease and phosphatase inhibitors. Lysates were sonicated and centrifuged for 10 min at maximum speed, and supernatants were collected. Five micrograms of each lysate were subjected to SDS-PAGE and Western blot analysis with antibodies

against phospho ERK1/2 (Cell Signaling #4370S), total ERK1/2 (Cell Signaling #4695S), SMYD3 (Santa Cruz #sc-67210), and Tubulin (Sigma #T9026).

## CHEMISTRY

The compounds in Table 1 were prepared straightforwardly according to the route depicted in Scheme 1. Amide coupling following up by the deprotection of Boc group offered the key intermediate **50**. Simply, sulfonamide formation with either the commercially available or readily accessible sulfonyl chlorides delivered the desired analogs.

### Scheme 1. General Synthetic Route

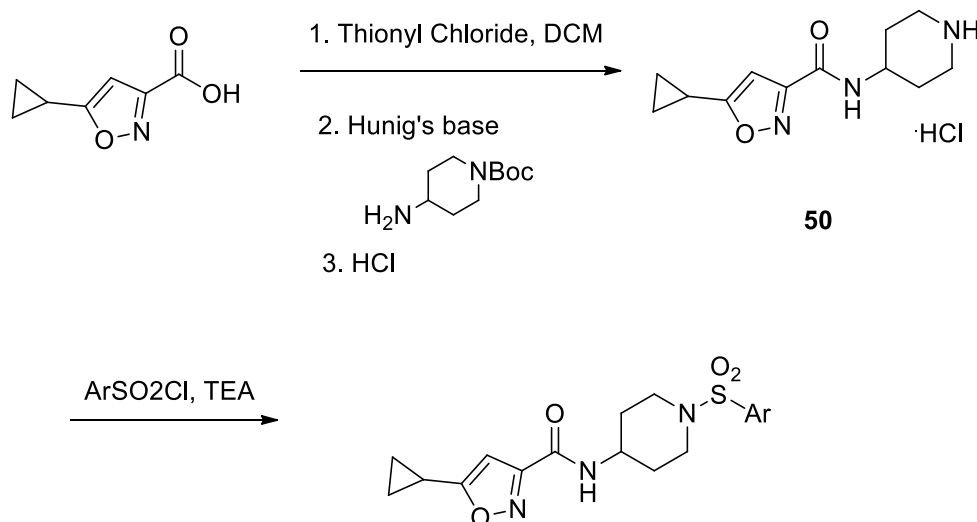

### Preparation of tert-butyl 4-(5-cyclopropylisoxazole-3-carboxamido)piperidine-1-carboxylate (**49**)

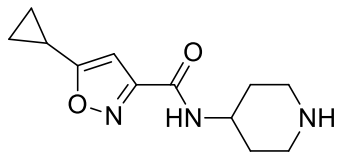

### Preparation of 5-cyclopropyl-N-(piperidin-4-yl)isoxazole-3-carboxamide, hydrochloride

To a solution of 5-cyclopropylisoxazole-3-carboxylic acid (4 g, 26.1 mmol) in Dichloromethane (DCM) (40 mL) was added oxalyl chloride (2 M DCM solution) (39.2 mL, 78 mmol) followed by DMF (0.18 mL, 2.35 mmol). The mixture was stirred at room temperature for 15 min and concentrated. To the residue in Tetrahydrofuran (THF) (40.0 mL) was added DIEA (13.69 mL, 78 mmol) and tert-butyl 4-aminopiperidine-1-carboxylate (5.23 g, 26.1 mmol). The mixture was

stirred at room temperature for 16 h, then diluted with ethyl acetate. The mixture was washed with saturated aqueous sodium bicarbonate and brine. The organic layer was dried (sodium sulfate), filtered, and concentrated. To the residue in Methanol (60.0 mL) was added 4 M HCl in dioxane (26.1 mL, 104 mmol). The mixture was stirred at room temperature for 16 h, then concentrated to provide 5-cyclopropyl-N-(piperidin-4-yl)isoxazole-3-carboxamide, hydrochloride (7.1 g, 25.8 mmol, 99% yield): LCMS (ES)  $m/z = 236.0$  (M+H)<sup>+</sup>.

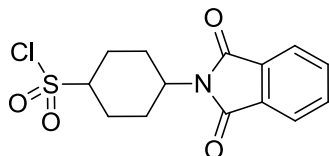

### Preparation of 4-(1,3-dioxoisindolin-2-yl)cyclohexane-1-sulfonyl chloride

a) ethyl 1,3-dioxoisindoline-2-carboxylate,

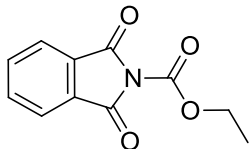

Ethyl carbonochloridate (1.95 mL, 20.39 mmol) was added slowly to a solution of isoindoline-1,3-dione (3000 mg, 20.39 mmol) and TEA (3.41 mL, 24.47 mmol) in N,N-Dimethylformamide (DMF) (80 mL) at 0 °C under N<sub>2</sub>. The reaction was warmed to RT gradually over 4 h, then water was added and the precipitate filtered. The collected solid was dried to give ethyl 1,3-dioxoisindoline-2-carboxylate (4.2 g, 19.2 mmol, 94% yield): LC-MS (ES)  $m/z 220.0$  (M+H)<sup>+</sup>.

b) 2-(4-hydroxycyclohexyl)isoindoline-1,3-dione,

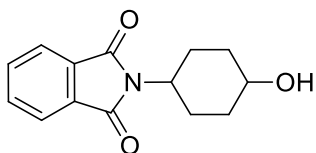

4-Aminocyclohexanol (1.31 g, 11.37 mmol) was added to a solution of ethyl 1,3-dioxoisindoline-2-carboxylate (2.8 g, 12.77 mmol) and K<sub>2</sub>CO<sub>3</sub> (1.59g, 11.50 mmol) in Water (30 mL) under N<sub>2</sub>. The reaction was warmed to RT gradually and stirred for 4 h. The mixture was filtered and the solid was dried to give 2-(4-hydroxycyclohexyl)isoindoline-1,3-dione (2.5 g, 10.2 mmol, 90% yield): LC-MS (ES)  $m/z 246.1$  (M+H)<sup>+</sup>.

c) 4-(1,3-dioxoisindolin-2-yl)cyclohexyl methanesulfonate,

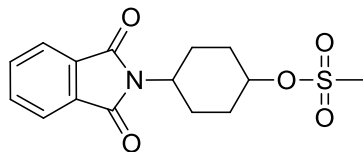

TEA (0.909 mL, 6.52 mmol) was added to a solution of 2-(4-hydroxycyclohexyl)isoindoline-1,3-dione (800 mg, 3.26 mmol) in Tetrahydrofuran (THF) (50 mL), followed by the addition of methanesulfonyl chloride (0.25 mL, 3.26 mmol) under 0 °C. The mixture was warmed to RT gradually and stirred for 4 h. The reaction mixture was diluted with EtOAc and was washed with brine. The organic layer was dried over magnesium sulfate, filtered, and concentrated under reduced pressure. The crude was purified by silica gel chromatography (Biotage SNAP 25g, 0-30% ethyl acetate/hexanes) to give 4-(1,3-dioxoisindolin-2-yl)cyclohexyl methanesulfonate (0.96 g, 2.97 mmol, 91% yield): LC-MS (ES)  $m/z$  324.1 (M+H)<sup>+</sup>.

d) S-(4-(1,3-dioxoisindolin-2-yl)cyclohexyl) ethanethioate,

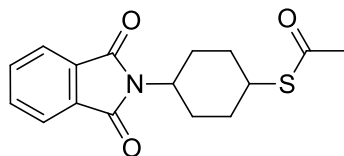

Ethanethioic S-acid (0.32 mL, 4.45 mmol) was added to a solution of 4-(1,3-dioxoisindolin-2-yl)cyclohexyl methanesulfonate (960 mg, 2.97 mmol) in N,N-Dimethylformamide (DMF) (10 mL), followed by the addition of potassium carbonate (821 mg, 5.94 mmol). The mixture was microwave irradiated at 120 °C for 30 min. The reaction mixture was diluted with EtOAc and was washed with water and brine. The organic layer was dried over magnesium sulfate, filtered and concentrated under reduced pressure. The crude was purified by silica gel chromatography (Biotage SNAP 25g, 0-30% ethyl acetate/hexanes) to provide S-(4-(1,3-dioxoisindolin-2-yl)cyclohexyl) ethanethioate (585 mg, 1.93 mmol, 65% yield): LC-MS (ES)  $m/z$  304.1 (M+H)<sup>+</sup>.

e) 4-(1,3-dioxoisindolin-2-yl)cyclohexane-1-sulfonyl chloride,

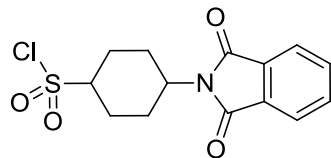

NCS (669 mg, 5.01 mmol) was added to a mixture of 2M HCl (0.4 mL) and Acetonitrile (2 mL), then cooled in an ice-bath. A solution of S-(4-(1,3-dioxoisindolin-2-yl)cyclohexyl) ethanethioate (380 mg, 1.25 mmol) in Acetonitrile (8 mL) was added dropwise. The ice-bath cooled mixture was stirred for 1 h, then diluted with ethyl acetate. The organic layer was washed with brine (3x), then dried (sodium sulfate), filtered, and concentrated to provide 4-(1,3-dioxoisindolin-2-

yl)cyclohexane-1-sulfonyl chloride (450 mg, 1.37 mmol, 110% yield): LC-MS (ES) m/z 328.1 (M+H)<sup>+</sup>.

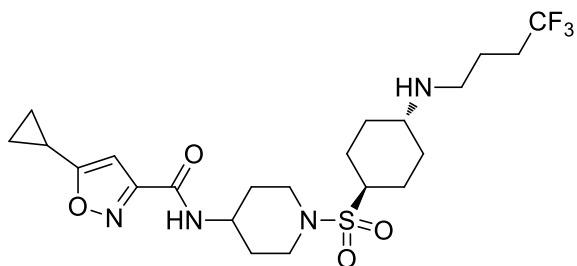

**Preparation of 5-cyclopropyl-N-(1-(((1r,4r)-4-((4,4,4-trifluorobutyl)amino)cyclohexyl)sulfonyl)piperidin-4-yl)isoxazole-3-carboxamide**

a) 5-cyclopropyl-N-(1-((4-(1,3-dioxoisindolin-2-yl)cyclohexyl)sulfonyl)piperidin-4-yl)isoxazole-3-carboxamide,

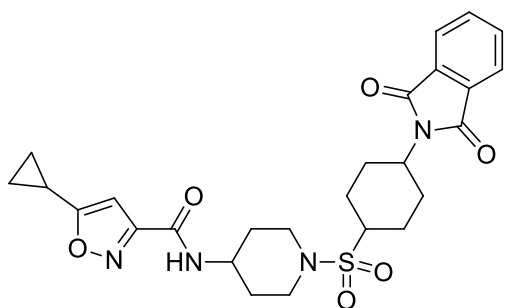

To a ice-bath cooled solution of 5-cyclopropyl-N-(piperidin-4-yl)isoxazole-3-carboxamide, Hydrochloride (300 mg, 1.10 mmol) and DIEA (0.39 mL, 2.21 mmol) in Dichloromethane (DCM) (10 mL) was added 4-(1,3-dioxoisindolin-2-yl)cyclohexane-1-sulfonyl chloride (434 mg, 1.33 mmol). After stirring for 30 min, the ice-bath was removed and stirring was continued for 16 h. After concentration, the residue was purified by silica gel chromatography (Biotage SNAP ultra 50g, 0-6% methanol/dichloromethane) to provide 5-cyclopropyl-N-(1-((4-(1,3-dioxoisindolin-2-yl)cyclohexyl)sulfonyl)piperidin-4-yl)isoxazole-3-carboxamide (360 mg, 0.68 mmol, 62% yield) as a white solid: LC-MS (ES) m/z 527.3 (M+H)<sup>+</sup>.

b) N-(1-((4-aminocyclohexyl)sulfonyl)piperidin-4-yl)-5-cyclopropylisoxazole-3-carboxamide,

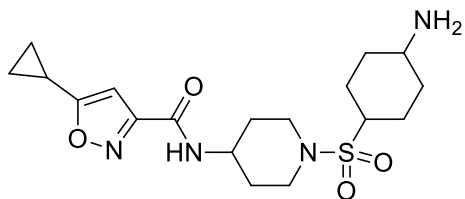



To a suspension of 5-cyclopropyl-N-(1-((4-(1,3-dioxisoindolin-2-yl)cyclohexyl)sulfonyl)piperidin-4-yl)isoxazole-3-carboxamide (360 mg, 0.68 mmol) in Ethanol (7000  $\mu$ l) and Tetrahydrofuran (THF) (7000  $\mu$ l) was added hydrazine monohydrate (200  $\mu$ l, 4.12 mmol). The mixture was stirred at 60 °C for 7 h, then diluted with dichloromethane and poured into 1N NaOH solution. The layers were separated and the organic layer was washed with brine, then dried (sodium sulfate), filtered, and concentrated to provide N-(1-((4-aminocyclohexyl)sulfonyl)piperidin-4-yl)-5-cyclopropylisoxazole-3-carboxamide (250 mg, 0.54 mmol, 78 % yield) as a white solid: LC-MS (ES) m/z 397.2 (M+H)<sup>+</sup>.

c)N-(1-(((1R,4R)-4-aminocyclohexyl)sulfonyl)piperidin-4-yl)-5-cyclopropylisoxazole-3-carboxamide,

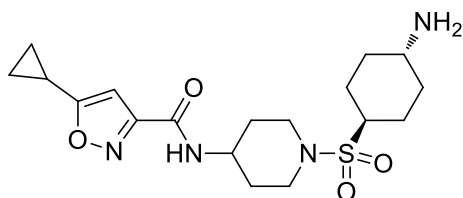

N-(1-((4-aminocyclohexyl)sulfonyl)piperidin-4-yl)-5-cyclopropylisoxazole-3-carboxamide (250 mg, 0.54 mmol) was purified by preparative chiral HPLC (Chiralpak AD-H, 5 microns (30 mm x 250 mm), 240 nm UV, 45 ml/min, 70:30:0.1 acetonitrile:methanol:isopropylamine) to provide N-(1-(((1R,4R)-4-aminocyclohexyl)sulfonyl)piperidin-4-yl)-5-cyclopropylisoxazole-3-carboxamide (116 mg, 0.29 mmol) as a white solid: LC-MS (ES) m/z 397.4 (M+H)<sup>+</sup>.

d) 5-cyclopropyl-N-(1-(((1R,4R)-4-((4,4,4-trifluorobutyl)amino)cyclohexyl)sulfonyl)piperidin-4-yl)isoxazole-3-carboxamide,

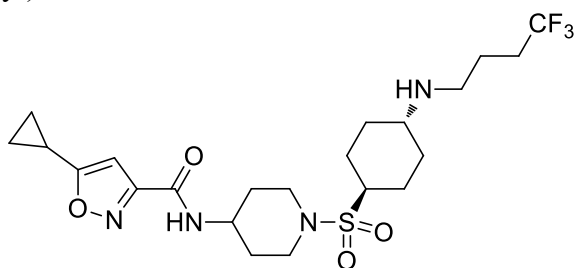

To a solution of N-(1-(((1R,4R)-4-aminocyclohexyl)sulfonyl)piperidin-4-yl)-5-cyclopropylisoxazole-3-carboxamide (75 mg, 0.19 mmol) and 4,4,4-trifluorobutanal (47.7 mg, 0.38 mmol) in Methanol (2 mL) and was added sodium cyanoborohydride (35.7 mg, 0.57 mmol). The mixture was stirred at room temperature for 16 h, then concentrated. The residue was purified by reversed-phase HPLC [Waters Sunfire 5  $\mu$ m C18, 75 X 30 mm, 5-65% acetonitrile (0.1% TFA)/water (0.1% TFA)]. The fractions containing the desired product were combined and passed through a PL-HCO<sub>3</sub> MP SPE cartridge. The eluate was concentrated to provide 5-cyclopropyl-N-(1-(((1R,4R)-4-((4,4,4-trifluorobutyl)amino)cyclohexyl)sulfonyl)piperidin-4-yl)isoxazole-3-carboxamide (37 mg, 0.07 mmol, 39 % yield) as a white solid: LC-MS (ES) m/z 507.4 (M+H)<sup>+</sup>, <sup>1</sup>H NMR (400 MHz, DMSO-*d*<sub>6</sub>)  $\delta$  ppm 0.89 - 0.95 (m, 2 H) 0.96 - 1.06 (m, 2 H) 1.07 - 1.12 (m, 2

H) 1.35 - 1.47 (m, 2 H) 1.49 - 1.63 (m, 5 H) 1.74 - 1.82 (m, 2 H) 1.90 - 2.04 (m, 4 H) 2.16 - 2.33 (m, 4 H) 2.56 (t,  $J=6.59$  Hz, 2 H) 2.96 - 3.09 (m, 3 H) 3.63 (d,  $J=12.67$  Hz, 2 H) 3.87 - 4.00 (m, 1 H) 6.49 (s, 1 H) 8.68 (d,  $J=8.11$  Hz, 1 H).

## Supplemental Data

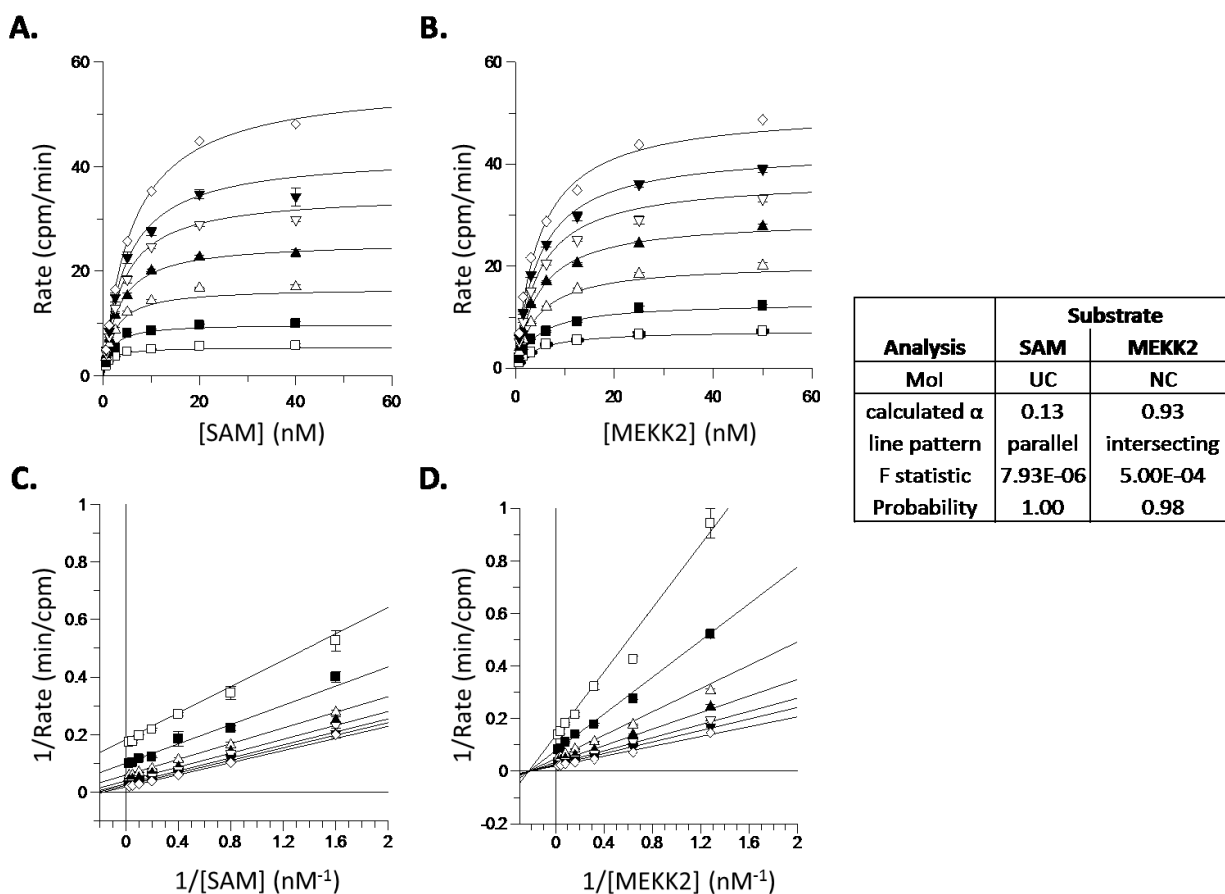

Supplemental Figure 1. Mode of inhibition against SMYD3 by compound **49**. Data were fit globally to an equation for mixed inhibition ( $v = (V_{max} * [S]) / ((K_m * (1+[I]/K_i) ) + ([S] * (1+[I]/K'))$ ) to determine kinetic parameters. Each symbol represents an inhibitor concentration, ranging from 3.13 nM ( $\blacktriangledown$ ) to 100 nM ( $\square$ ), 2-fold serial dilution or DMSO ( $\diamond$ ). **Top Panel.** Averaged results (n=4) showing initial velocity data for inhibition of SMYD3 with respect to substrate SAM (A) or MEKK2 (B). **Bottom Panel.** Lineweaver-Burk plots with respect to substrate SAM (C) or MEKK2 (D). **Table.** Mode of inhibition for compound **49** was deduced as SAM uncompetitive and MEKK2 noncompetitive based on the calculated alpha value ( $\alpha = K_i' / K_i$ ), characteristic line pattern of the Lineweaver-Burk plots and through statistical analysis.

## Protein preparation for crystallization and structure solution

SMYD3 protein expression, purification, crystallization and structure solution as previously described.<sup>14</sup> Crystallizations with cofactors SAH or SAM were carried out under the same protocols. Data were collected at Argonne National Labs at the APS, LS-CAT, 21idD and 21idF.

**Table S1. Crystallographic Data**

|                                       | <b>Comp 28</b>                 | <b>Comp 3</b>                  | <b>Comp 1</b>                  | <b>Comp 14</b>                   |
|---------------------------------------|--------------------------------|--------------------------------|--------------------------------|----------------------------------|
| <b>Wavelength</b>                     | 0.9787                         | 1.07805                        | 1.0000                         | 1.07805                          |
| <b>Resolution range</b>               | 56.61 -1.586<br>(1.643 -1.586) | 31.52 - 1.55<br>(1.606 - 1.55) | 31.62 - 1.19<br>(1.233 - 1.19) | 31.52 - 1.221<br>(1.265 - 1.221) |
| <b>Space group</b>                    | P 21 21 21                       |
| <b>Unit cell</b>                      | 61.4 66.6 107.3<br>90 90 90    | 60.7 66.0<br>105.8 90 90 90    | 61.1 66.2 107.3<br>90 90 90    | 61.0 66.0 106.5<br>90 90 90      |
| <b>Unique reflections</b>             | 60111 (5707)                   | 61111 (6001)                   | 138729 (13635)                 | 124464 (11677)                   |
| <b>Completeness (%)</b>               | 99.55 (96.11)                  | 97.89 (97.26)                  | 99.22 (98.48)                  | 97.32 (92.24)                    |
| <b>Wilson B-factor</b>                | 18.40                          | 16.39                          | 9.29                           | 11.29                            |
| <b>R-merge</b>                        | 0.064                          | 0.063                          | 0.054                          | 0.082                            |
| <b>Reflections used in refinement</b> | 60106 (5707)                   | 61092 (5993)                   | 138725 (13635)                 | 124455 (11676)                   |
| <b>Reflections used for R-free</b>    | 2963 (260)                     | 3026 (287)                     | 6967 (655)                     | 6178 (528)                       |
| <b>R-work</b>                         | 0.1723 (0.2725)                | 0.1786(0.2584)                 | 0.1820 (0.2530)                | 0.1715 (0.2378)                  |
| <b>R-free</b>                         | 0.2002 (0.3266)                | 0.2147(0.2799)                 | 0.1992 (0.2737)                | 0.1914 (0.2515)                  |
| <b>Number of non-hydrogen atoms</b>   | 3833                           | 3833                           | 4048                           | 3922                             |
| <b>-macromolecules</b>                | 3377                           | 3393                           | 3462                           | 3370                             |
| <b>-compound</b>                      | 37                             | 23                             | 21                             | 28                               |
| <b>-cofactor</b>                      | SAH 26                         | SAM 27                         | SAM 27                         | SAM 27                           |
| <b>-solvent</b>                       | 396                            | 402                            | 560                            | 507                              |
| <b>Protein residues</b>               | 426                            | 424                            | 425                            | 423                              |
| <b>RMS (bonds)</b>                    | 0.006                          | 0.006                          | 0.005                          | 0.011                            |
| <b>RMS (angles)</b>                   | 0.86                           | 0.90                           | 0.85                           | 1.29                             |
| <b>Ramachandran favored (%)</b>       | 99.06                          | 99.28                          | 99.05                          | 99.28                            |
| <b>Ramachandran allowed (%)</b>       | 0.94                           | 0.72                           | 0.95                           | 0.72                             |
| <b>Ramachandran outliers (%)</b>      | 0.00                           | 0.00                           | 0.00                           | 0.00                             |
| <b>Rotamer outliers (%)</b>           | 0.55                           | 0.82                           | 0.26                           | 0.83                             |

|                                         |      |      |      |      |
|-----------------------------------------|------|------|------|------|
| <b>Clashscore</b>                       | 0.59 | 2.37 | 1.88 | 1.78 |
| <b>Average B-factor (Å<sup>2</sup>)</b> | 24   | 25   | 15   | 17   |
| <b>-macromolecules</b>                  | 23   | 25   | 14   | 16   |
| <b>-ligand</b>                          | 26   | 23   | 29   | 15   |
| <b>-solvent</b>                         | 31   | 30   | 24   | 26   |
| <b>-cofactor</b>                        | 16   | 13   | 6    | 8    |

**Table S2. Kinase Profiling Results for Compound 49**

Compound **49** was tested in single dose duplicate mode at a concentration of 10  $\mu$ M at Reaction Biology Corporation (Malvern, PA, USA). Reactions were carried out at 10  $\mu$ M ATP. Data reported as % Enzyme activity (relative to DMSO controls).

| <b>Kinase:</b> | <b>% Enzyme Activity<br/>(relative to DMSO<br/>controls)</b> |
|----------------|--------------------------------------------------------------|
| ABL1           | 98.65                                                        |
| ABL2/ARG       | 93.30                                                        |
| ACK1           | 93.06                                                        |
| AKT1           | 99.79                                                        |
| AKT2           | 96.57                                                        |
| AKT3           | 98.86                                                        |
| ALK            | 94.41                                                        |
| ALK1/ACVRL1    | 103.35                                                       |
| ALK2/ACVR1     | 93.45                                                        |
| ALK3/BMPR1A    | 105.51                                                       |
| ALK4/ACVR1B    | 98.65                                                        |
| ALK5/TGFBR1    | 99.49                                                        |
| ALK6/BMPR1B    | 102.92                                                       |
| ARAF           | 94.49                                                        |
| ARK5/NUAK1     | 99.06                                                        |
| ASK1/MAP3K5    | 85.15                                                        |
| AURORA A       | 99.19                                                        |
| AURORA B       | 94.47                                                        |
| AURORA C       | 110.58                                                       |
| AXL            | 90.87                                                        |
| BLK            | 92.67                                                        |
| BMPR2          | 97.04                                                        |
| BMX/ETK        | 99.95                                                        |
| BRAF           | 95.66                                                        |
| BRK            | 94.20                                                        |
| BRSK1          | 93.93                                                        |
| BRSK2          | 97.04                                                        |
| BTK            | 105.96                                                       |
| CAMK1A         | 100.03                                                       |
| CAMK1B         | 81.59                                                        |

|                          |        |
|--------------------------|--------|
| CAMK1D                   | 90.69  |
| CAMK1G                   | 96.64  |
| CAMK2A                   | 99.33  |
| CAMK2B                   | 104.41 |
| CAMK2D                   | 94.24  |
| CAMK2G                   | 99.61  |
| CAMK4                    | 89.66  |
| CAMKK1                   | 82.05  |
| CAMKK2                   | 84.08  |
| CDC7/DBF4                | 94.04  |
| CDK1/cyclin A            | 94.72  |
| CDK1/cyclin B            | 83.36  |
| CDK1/cyclin E            | 95.77  |
| CDK14/cyclin Y (PFTK1)   | 100.45 |
| CDK16/cyclin Y (PCTAIRE) | 96.97  |
| CDK17/cyclin Y (PCTK2)   | 100.37 |
| CDK18/cyclin Y (PCTK3)   | 109.75 |
| CDK2/cyclin A            | 93.61  |
| CDK2/Cyclin A1           | 103.08 |
| CDK2/cyclin E            | 96.23  |
| CDK2/cyclin O            | 95.43  |
| CDK3/cyclin E            | 95.80  |
| CDK4/cyclin D1           | 105.56 |
| CDK4/cyclin D3           | 95.96  |
| CDK5/p25                 | 102.67 |
| CDK5/p35                 | 90.70  |
| CDK6/cyclin D1           | 95.95  |
| CDK6/cyclin D3           | 98.54  |
| CDK7/cyclin H            | 89.54  |
| CDK9/cyclin K            | 107.37 |
| CDK9/cyclin T1           | 105.44 |
| CDK9/cyclin T2           | 90.74  |
| CHK1                     | 121.08 |
| CHK2                     | 102.58 |
| CK1A1                    | 96.99  |
| CK1A1L                   | 103.29 |
| CK1D                     | 101.41 |
| CK1EPSILON               | 92.06  |
| CK1G1                    | 97.27  |
| CK1G2                    | 108.00 |
| CK1G3                    | 122.42 |

|              |        |
|--------------|--------|
| CK2A         | 94.23  |
| CK2A2        | 97.36  |
| C-KIT        | 103.32 |
| CLK1         | 106.31 |
| CLK2         | 94.72  |
| CLK3         | 100.12 |
| CLK4         | 87.73  |
| C-MER        | 96.67  |
| C-MET        | 109.56 |
| COT1/MAP3K8  | 102.62 |
| CSK          | 100.88 |
| C-SRC        | 99.23  |
| CTK/MATK     | 96.94  |
| DAPK1        | 102.23 |
| DAPK2        | 102.52 |
| DCAMKL1      | 90.42  |
| DCAMKL2      | 86.64  |
| DDR1         | 96.27  |
| DDR2         | 105.27 |
| DLK/MAP3K12  | 89.97  |
| DMPK         | 100.04 |
| DMPK2        | 110.07 |
| DRAK1/STK17A | 87.26  |
| DYRK1/DYRK1A | 121.47 |
| DYRK1B       | 98.32  |
| DYRK2        | 98.21  |
| DYRK3        | 101.66 |
| DYRK4        | 100.40 |
| EGFR         | 100.36 |
| EPHA1        | 104.11 |
| EPHA2        | 98.79  |
| EPHA3        | 91.66  |
| EPHA4        | 100.12 |
| EPHA5        | 95.43  |
| EPHA6        | 93.30  |
| EPHA7        | 105.03 |
| EPHA8        | 98.79  |
| EPHB1        | 101.11 |
| EPHB2        | 97.28  |
| EPHB3        | 96.79  |
| EPHB4        | 100.28 |



|             |        |
|-------------|--------|
| ERBB2/HER2  | 98.39  |
| ERBB4/HER4  | 96.63  |
| ERK1        | 94.86  |
| ERK2/MAPK1  | 96.19  |
| ERK5/MAPK7  | 81.23  |
| ERK7/MAPK15 | 101.46 |
| ERN1/IRE1   | 99.59  |
| ERN2/IRE2   | 94.60  |
| FAK/PTK2    | 93.72  |
| FER         | 99.63  |
| FES/FPS     | 94.84  |
| FGFR1       | 100.58 |
| FGFR2       | 102.54 |
| FGFR3       | 100.61 |
| FGFR4       | 98.89  |
| FGR         | 101.98 |
| FLT1/VEGFR1 | 94.93  |
| FLT3        | 94.30  |
| FLT4/VEGFR3 | 107.42 |
| FMS         | 105.72 |
| FRK/PTK5    | 99.49  |
| FYN         | 93.05  |
| GCK/MAP4K2  | 103.04 |
| GLK/MAP4K3  | 105.03 |
| GRK1        | 84.33  |
| GRK2        | 102.07 |
| GRK3        | 96.02  |
| GRK4        | 100.50 |
| GRK5        | 102.55 |
| GRK6        | 104.30 |
| GRK7        | 97.35  |
| GSK3A       | 97.89  |
| GSK3B       | 91.06  |
| HASPIN      | 100.53 |
| HCK         | 90.34  |
| HGK/MAP4K4  | 99.29  |
| HIPK1       | 106.59 |
| HIPK2       | 102.89 |
| HIPK3       | 100.65 |
| HIPK4       | 97.63  |
| HPK1/MAP4K1 | 104.01 |

|               |        |
|---------------|--------|
| IGF1R         | 96.51  |
| IKKa/CHUK     | 100.13 |
| IKKb/IKBKB    | 100.38 |
| IKKe/IKBKE    | 99.61  |
| IR            | 95.40  |
| IRAK1         | 106.62 |
| IRAK4         | 109.58 |
| IRR/INSRR     | 93.00  |
| ITK           | 100.01 |
| JAK1          | 83.80  |
| JAK2          | 101.16 |
| JAK3          | 104.58 |
| JNK1          | 87.58  |
| JNK2          | 97.69  |
| JNK3          | 102.58 |
| KDR/VEGFR2    | 97.95  |
| KHS/MAP4K5    | 99.20  |
| KSR1          | 95.34  |
| KSR2          | 97.01  |
| LATS1         | 98.43  |
| LATS2         | 99.80  |
| LCK           | 92.84  |
| LCK2/ICK      | 88.09  |
| LIMK1         | 97.44  |
| LIMK2         | 97.81  |
| LKB1          | 87.61  |
| LOK/STK10     | 96.85  |
| LRRK2         | 91.14  |
| LYN           | 98.97  |
| LYN B         | 101.05 |
| MAK           | 99.40  |
| MAPKAPK2      | 100.14 |
| MAPKAPK3      | 93.34  |
| MAPKAPK5/PRAK | 82.09  |
| MARK1         | 103.69 |
| MARK2/PAR-1Ba | 103.98 |
| MARK3         | 149.02 |
| MARK4         | 90.22  |
| MEK1          | 99.26  |
| MEK2          | 80.84  |
| MEK3          | 103.12 |

|                |        |
|----------------|--------|
| MEK5           | 104.33 |
| MEKK1          | 104.78 |
| MEKK2          | 103.12 |
| MEKK3          | 102.52 |
| MEKK6          | 119.25 |
| MELK           | 96.49  |
| MINK/MINK1     | 95.15  |
| MKK4           | 101.67 |
| MKK6           | 104.29 |
| MKK7           | 99.54  |
| MLCK/MYLK      | 90.50  |
| MLCK2/MYLK2    | 86.89  |
| MLK1/MAP3K9    | 96.91  |
| MLK2/MAP3K10   | 101.71 |
| MLK3/MAP3K11   | 80.55  |
| MLK4           | 99.13  |
| MNK1           | 94.26  |
| MNK2           | 102.24 |
| MRCKa/CDC42BPA | 89.44  |
| MRCKb/CDC42BPB | 102.59 |
| MSK1/RPS6KA5   | 102.36 |
| MSK2/RPS6KA4   | 104.66 |
| MSSK1/STK23    | 100.79 |
| MST1/STK4      | 104.65 |
| MST2/STK3      | 100.47 |
| MST3/STK24     | 87.75  |
| MST4           | 90.50  |
| MUSK           | 93.35  |
| MYLK3          | 99.54  |
| MYLK4          | 97.13  |
| MYO3A          | 91.74  |
| MYO3B          | 87.44  |
| NEK1           | 94.82  |
| NEK11          | 82.91  |
| NEK2           | 96.91  |
| NEK3           | 95.27  |
| NEK4           | 100.53 |
| NEK5           | 99.96  |
| NEK6           | 97.12  |
| NEK7           | 100.26 |
| NEK8           | 77.53  |

|                 |        |
|-----------------|--------|
| NEK9            | 96.49  |
| NIM1            | 100.00 |
| NLK             | 92.82  |
| OSR1/OXSR1      | 95.11  |
| P38a/MAPK14     | 101.99 |
| P38b/MAPK11     | 113.21 |
| P38d/MAPK13     | 99.69  |
| P38G            | 98.66  |
| p70S6K/RPS6KB1  | 98.49  |
| p70S6Kb/RPS6KB2 | 102.96 |
| PAK1            | 91.47  |
| PAK2            | 92.52  |
| PAK3            | 97.37  |
| PAK4            | 108.55 |
| PAK5            | 101.94 |
| PAK6            | 102.03 |
| PASK            | 91.09  |
| PBK/TOPK        | 96.34  |
| PDGFRA          | 96.90  |
| PDGFRB          | 91.08  |
| PDK1/PDPK1      | 88.20  |
| PEAK1           | 91.97  |
| PHKG1           | 97.00  |
| PHKG2           | 102.93 |
| PIM1            | 98.85  |
| PIM2            | 96.40  |
| PIM3            | 104.48 |
| PKA             | 97.24  |
| PKACB           | 107.76 |
| PKACG           | 102.12 |
| PKCA            | 90.33  |
| PKCB1           | 84.78  |
| PKCB2           | 99.22  |
| PKCD            | 102.77 |
| PKCEPSILON      | 101.20 |
| PKCETA          | 102.77 |
| PKCG            | 101.96 |
| PKCIOTA         | 108.58 |
| PKCmu/PRKD1     | 122.53 |
| PKCnu/PRKD3     | 102.25 |
| PKCTHETA        | 114.81 |

|             |        |
|-------------|--------|
| PKCZETA     | 103.25 |
| PKD2/PRKD2  | 99.65  |
| PKG1A       | 100.74 |
| PKG1B       | 96.18  |
| PKG2/PRKG2  | 97.16  |
| PKN1/PRK1   | 92.79  |
| PKN2/PRK2   | 100.16 |
| PKN3/PRK3   | 92.89  |
| PLK1        | 96.52  |
| PLK2        | 102.66 |
| PLK3        | 100.22 |
| PLK4/SAK    | 109.30 |
| PRKX        | 97.65  |
| PYK2        | 106.16 |
| RAF1        | 101.71 |
| RET         | 96.28  |
| RIPK2       | 103.10 |
| RIPK3       | 107.25 |
| RIPK5       | 101.41 |
| ROCK1       | 96.85  |
| ROCK2       | 99.80  |
| RON/MST1R   | 98.63  |
| ROS/ROS1    | 96.19  |
| RSK1        | 87.79  |
| RSK2        | 99.52  |
| RSK3        | 113.93 |
| RSK4        | 95.85  |
| SBK1        | 100.83 |
| SGK1        | 97.46  |
| SGK2        | 100.17 |
| SGK3/SGKL   | 85.85  |
| SIK1        | 99.65  |
| SIK2        | 94.50  |
| SIK3        | 93.06  |
| SLK/STK2    | 96.90  |
| SNARK/NUAK2 | 92.80  |
| SNRK        | 88.97  |
| SRMS        | 96.44  |
| SRPK1       | 92.59  |
| SRPK2       | 96.97  |
| SSTK/TSSK6  | 103.85 |

|              |        |
|--------------|--------|
| STK16        | 100.64 |
| STK21/CIT    | 98.55  |
| STK22D/TSSK1 | 94.52  |
| STK25/YSK1   | 96.15  |
| STK32B/YANK2 | 100.52 |
| STK32C/YANK3 | 134.20 |
| STK33        | 102.64 |
| STK38/NDR1   | 94.80  |
| STK38L/NDR2  | 98.25  |
| STK39/STLK3  | 90.54  |
| SYK          | 95.43  |
| TAK1         | 100.60 |
| TAOK1        | 96.21  |
| TAOK2/TAO1   | 99.36  |
| TAOK3/JIK    | 88.66  |
| TBK1         | 98.12  |
| TEC          | 102.75 |
| TESK1        | 93.54  |
| TGFBR2       | 124.69 |
| TIE2/TEK     | 96.25  |
| TLK1         | 102.61 |
| TLK2         | 82.33  |
| TNIK         | 93.36  |
| TNK1         | 101.44 |
| TRKA         | 96.96  |
| TRKB         | 98.73  |
| TRKC         | 103.58 |
| TSSK2        | 102.40 |
| TSSK3/STK22C | 103.62 |
| TTBK1        | 103.12 |
| TTBK2        | 105.77 |
| TXK          | 94.66  |
| TYK1/LTK     | 99.77  |
| TYK2         | 102.96 |
| TYRO3/SKY    | 103.67 |
| ULK1         | 104.29 |
| ULK2         | 98.72  |
| ULK3         | 93.11  |
| VRK1         | 100.03 |
| VRK2         | 94.58  |
| WEE1         | 100.43 |

|              |        |
|--------------|--------|
| WNK1         | 80.75  |
| WNK2         | 103.21 |
| WNK3         | 90.77  |
| YES/YES1     | 97.50  |
| YSK4/MAP3K19 | 103.08 |
| ZAK/MLTK     | 96.79  |
| ZAP70        | 86.02  |
| ZIPK/DAPK3   | 94.77  |

**Table S3. Methyltransferase Profiling Results for Compound 49**

Compound **49** was tested in single dose duplicate mode at a concentration of 10  $\mu$ M at Reaction Biology Corporation (Malvern, PA, USA). Data reported as % Enzyme activity (no inhibition control as 100% activity).

| <b>Methyltransferase<br/>(GENE_NAME)</b> | <b>% Enzyme<br/>Activity (relative<br/>to DMSO controls)</b> | <b>Substrate</b>  | <b>SAM<br/>Concentration<br/>(<math>\mu</math>M)</b> |
|------------------------------------------|--------------------------------------------------------------|-------------------|------------------------------------------------------|
| Dot1L                                    | 103.62                                                       | Nucleosomes       | 1                                                    |
| EZH1 Complex                             | 101.33                                                       | Core Histone      | 1                                                    |
| EZH2 (Y641F) Complex                     | 93.94                                                        | Core Histone      | 1                                                    |
| EZH2 Complex                             | 101.54                                                       | Core Histone      | 1                                                    |
| G9a                                      | 101.30                                                       | Histone H3 (1-21) | 1                                                    |
| G9a/GLP                                  | 98.16                                                        | Histone H3 (1-21) | 1                                                    |
| GLP                                      | 104.66                                                       | Histone H3 (1-21) | 1                                                    |
| MLL1 Complex                             | 110.60                                                       | Nucleosomes       | 1                                                    |
| MLL2 Complex                             | 98.88                                                        | Core Histone      | 1                                                    |
| MLL3 Complex                             | 97.67                                                        | Core Histone      | 1                                                    |
| MLL4 Complex                             | 89.20                                                        | Core Histone      | 1                                                    |
| NSD1                                     | 89.54                                                        | Nucleosomes       | 1                                                    |
| NSD2                                     | 93.01                                                        | Nucleosomes       | 1                                                    |
| NSD2 (E1099K)                            | 98.26                                                        | Nucleosomes       | 1                                                    |
| PRDM9                                    | 99.09                                                        | Histone H3        | 1                                                    |
| PRMT1                                    | 91.60                                                        | Histone H4        | 1                                                    |
| PRMT3                                    | 98.22                                                        | Histone H4        | 1                                                    |
| PRMT4                                    | 102.08                                                       | Histone H3        | 1                                                    |
| PRMT5                                    | 100.92                                                       | Histone H2A       | 1                                                    |
| PRMT5/MEP50                              | 107.45                                                       | Histone H2A       | 1                                                    |

|               |        |              |   |
|---------------|--------|--------------|---|
| PRMT6         | 95.19  | Histone H3   | 1 |
| PRMT8         | 96.10  | Histone H4   | 1 |
| SET1B Complex | 98.95  | Core Histone | 1 |
| SET7          | 91.60  | Core Histone | 1 |
| SET8          | 99.86  | Nucleosomes  | 1 |
| SETD2         | 100.07 | Nucleosomes  | 1 |
| SMYD2         | 100.79 | Histone H4   | 1 |
| SUV39H1       | 100.06 | Histone H3   | 1 |
| SUV39H2       | 96.31  | Histone H3   | 1 |
| SUV420H1-tv2  | 98.57  | Nucleosomes  | 1 |
